# Supplementary material for: Observation of Electric-Field-Induced Structural Dislocations in a Ferroelectric Oxide
Source: PubMed Central journal article supplement (PMC8155316; doi:10.1021/acs.nanolett.0c04816), 2021-04-16
Supplement: nl0c04816_si_001.pdf [file nl0c04816_si_001.pdf]

# Observation of Electric-Field-Induced Structural Dislocations in a Ferroelectric Oxide

*Donald M. Evans,<sup>1\*</sup> Didrik René Småbråten,<sup>1‡</sup> Theodor S. Holstad,<sup>1</sup> Per Erik Vullum,<sup>2</sup> Aleksander B. Mosberg,<sup>3</sup> Zewu Yan,<sup>4,5</sup> Edith Bourret,<sup>5</sup> Antonius T. J. van Helvoort,<sup>3</sup> Sverre M. Selbach,<sup>1</sup> and Dennis Meier<sup>1\*</sup>*

*\*E-mail: [donald.evans@uni-a.de](mailto:donald.evans@uni-a.de) and [dennis.meier@ntnu.no](mailto:dennis.meier@ntnu.no)*

<sup>1</sup> Department of Materials Science and Engineering, Norwegian University of Science and Technology (NTNU), Trondheim, Norway.

<sup>2</sup> SINTEF Industry, 7491 Trondheim, Norway.

<sup>3</sup> Department of Physics, Norwegian University of Science and Technology (NTNU), Trondheim, Norway.

<sup>4</sup> Department of Physics, ETH Zürich, 8093 Zürich, Switzerland.

<sup>5</sup> Materials Sciences Division, Lawrence Berkeley National Laboratory, Berkeley, California 94720, USA.

## Supplementary Materials

**Table S1.** Comparison of calculated  $a$  and  $c$  lattice parameters, bulk polarization ( $P$ ), apical ( $\theta$ ) and planar ( $\alpha$ )  $\text{MnO}_5$  tilt angles, and electronic band gap ( $E_g$ ) in  $\text{YMnO}_3$  and  $\text{ErMnO}_3$ .

| Parameter                         | $\text{YMnO}_3$ | $\text{ErMnO}_3$ |
|-----------------------------------|-----------------|------------------|
| $a$ (Å)                           | 6.100           | 6.049            |
| $c$ (Å)                           | 11.420          | 11.370           |
| $P$ ( $\mu\text{C}/\text{cm}^2$ ) | 7.051           | 7.968            |
| $\theta$ ( $^\circ$ )             | 5.107           | 5.273            |
| $\alpha$ ( $^\circ$ )             | 7.082           | 7.569            |
| $E_g$ (eV)                        | 1.531           | 1.565            |

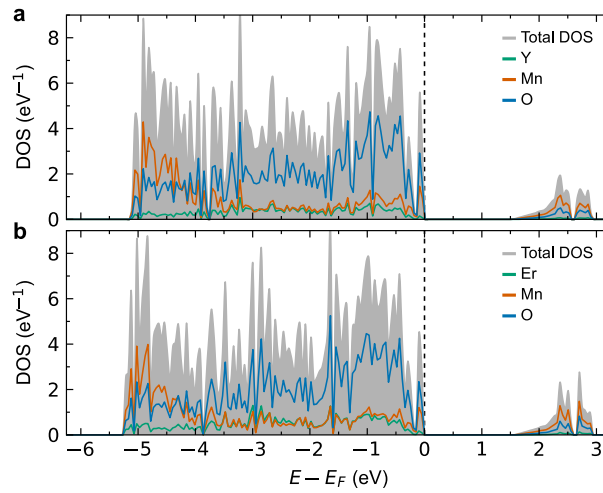

**Figure S1.** Calculated electronic density of states (DOS) of **a**  $\text{YMnO}_3$ , and **b**  $\text{ErMnO}_3$ .

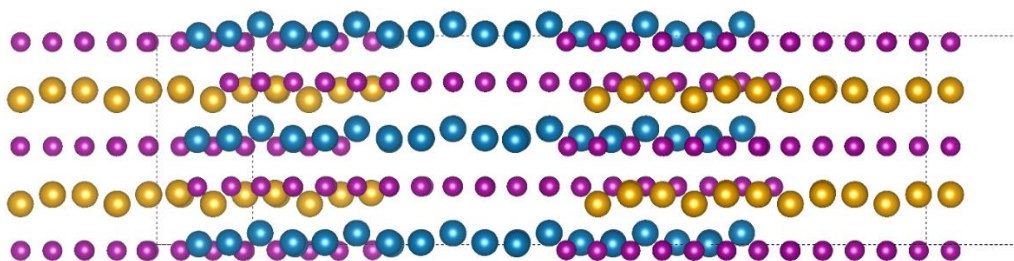

**Figure S2 | A  $c/4$  and  $a/3$  dislocated structure viewed at  $60^\circ$  to the interface.** DFT calculations showing one of the symmetrically equivalent  $c/4$ ,  $a/3$ , dislocated structures viewed along the  $[110]$  direction, or symmetrically equivalent projections. In this case, there is a continual merging of the  $R$ -cation and Mn atomic columns, as observed in the HAADF-STEM of Figure 2c.

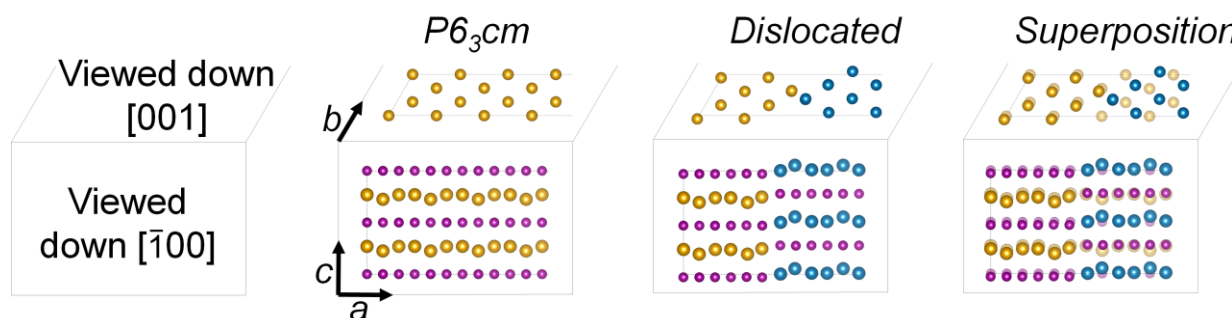

**Figure S3 | Viewing directions and depth effects.** Left: Illustration of the atomic structure in the unit cell of hexagonal manganites with space group symmetry  $P6_3cm$ , viewed along the  $[001]$  and  $[\bar{1}00]$  directions. Er and Mn atoms are represented by gold and purple spheres, respectively. Middle: Comparison of dislocated structures; Er (gold and blue) and Mn (purple). Right: Superposition of the structures seen on the left and in the middle.

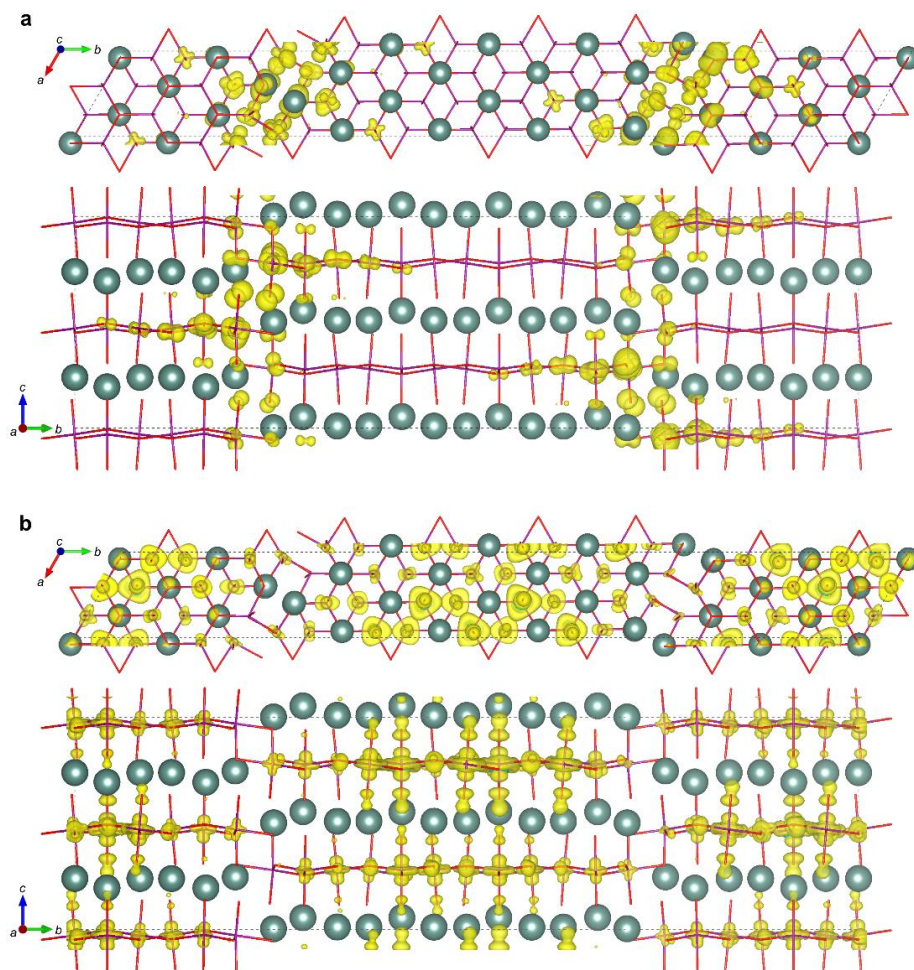

**Figure S4 | Change in local orbitals at a dislocation.** **a**, Visualization of the calculated partial charge density for the highest occupied wavefunction, illustrating the position of the valence band edge in the supercell. **b**, Visualization of the calculated partial charge density of the lowest unoccupied wavefunction, illustrating the position of the conduction band edge in the supercell.
